# Supplementary material
Source: PubMed Central journal article supplement (PMC5434089)
Supplement: rstb20160138supp1.pdf [file rstb20160138supp1.pdf]

## **Details of simulations for figure 2**

We simulated evolution of reaction norms in response to a temporally changing environment  $\varepsilon$ . The environment was binned into 20 discrete categories or environmental units  $\varepsilon_1$  to  $\varepsilon_{20}$  (e.g. temperatures), and the reaction norm was defined by the phenotypic values (character states) expressed at each of the environmental units, for instance  $z_{10}$  for environment  $\varepsilon_{10}$ . Our population-based simulations tracked the mean phenotypes  $\bar{z}_i$  expressed in each environment, assuming normal phenotypic distributions within environment, with constant additive genetic variances and covariances, following earlier work [1, 2]. We also assumed for simplicity that the genetic variance is the same in all environments ( $G = 1$ ), and that the additive genetic correlation between trait values expressed in different environments is positive and decreases exponentially with their environmental distance  $\Delta\varepsilon$  (that is,  $\rho^{|\Delta\varepsilon|}$  with  $\rho > 0$ ). This latter assumption ensures that reaction norms have reasonably smooth shapes, and that character states are more similar between closer environments.

All individuals in the population were assumed to experience the same environment in any generation. In each generation the environment of development was randomly drawn from a mixture of two uniform distributions: one for common environments ( $\varepsilon_1$  to  $\varepsilon_{13}$ ) and another for extreme environments ( $\varepsilon_{14}$  to  $\varepsilon_{20}$ ), with  $r$  the odds ratio of frequencies of rare over common environmental units.

Natural selection towards a phenotypic optimum  $\theta$  was modeled using a Gaussian fitness function with width  $\omega$ , assumed constant across environments. Selection can only act directly on the expressed trait value, and the fitness of individuals developing in environment  $\varepsilon_i$  and expressing phenotype  $z_i$  in generation  $t$  is

$$W_t(z_i) \propto \exp\left(-\frac{(z_i - \theta_{i,t})^2}{2\omega^2}\right).$$

Integrating over the phenotype distribution, the mean fitness is

$$\bar{W}_t(\bar{z}_i) \propto \exp\left(-\frac{S(\bar{z}_i - \theta_{i,t})^2}{2}\right),$$

where  $S = 1/(\omega^2 + P)$  (with  $P$  the phenotypic variance) is the strength of stabilizing selection. The parameter  $\theta_{i,t}$  can be interpreted as the optimum phenotype experienced by individuals developing in environment  $\varepsilon_i$  at generation  $t$ . Note that this optimum may differ from the optimum phenotype occurring in the environment  $\varepsilon_i$  itself, because the

environment may change between development and selection, or cues may be unreliable [3-6]. To account for partial unpredictability of the environment of selection conditional on the environment of development (or imperfect cue reliability),  $\theta_{i,t}$  was drawn from a normal distribution with mean  $\theta_i$  and variance  $\sigma_\theta^2 = \frac{1}{4}$ . We considered linear change (with slope  $\frac{1}{2}$ ) of the expected optimum  $\theta_i$  against the environments of development. Following standard evolutionary quantitative genetics [2, 7], the response by the trait value in each environment  $\varepsilon_j$  to selection on the trait expressed in environment  $\varepsilon_i$  in generation  $t$  is

$$\Delta\bar{z}_{j,t} = -S(\bar{z}_i - \theta_{i,t}) \rho^{|i-j|} G.$$

Lastly, we accounted for random genetic drift by drawing the vector of mean phenotypes in each environment  $\varepsilon_i$  in the next generation from a Gaussian distribution with mean  $\bar{z}_i + \Delta\bar{z}_i$  and covariance matrix  $\mathbf{G}/N_e$  (following [7]), with  $N_e = 1000$  the effective population size, and  $\mathbf{G}$  the additive genetic (co)variance matrix, with diagonal elements  $G_{ii} = G$  and off-diagonal elements  $G_{ij} = G\rho^{|i-j|}$ .

Simulations were started with the mean phenotype at its conditional optimum for each environment of development, and were run for 20000 generations.

## References

- [1] Gomulkiewicz, R. & Kirkpatrick, M. 1992 Quantitative genetics and the evolution of reaction norms. *Evolution* **46**, 390-411.
- [2] Via, S. & Lande, R. 1985 Genotype-environment interaction and the evolution of phenotypic plasticity. *Evolution* **39**, 505-522.
- [3] Tufto, J. 2000 The evolution of plasticity and nonplastic spatial and temporal adaptations in the presence of imperfect environmental cues. *Am. Nat.* **156**, 121-130. (doi:AN990251 [pii] 10.1086/303381).
- [4] Chevin, L.M., Collins, S. & Lefèvre, F. 2013 Phenotypic plasticity and evolutionary demographic responses to climate change: taking theory out to the field. *Funct. Ecol.* **27**, 966–979.
- [5] Lande, R. 2009 Adaptation to an extraordinary environment by evolution of phenotypic plasticity and genetic assimilation. *J. Evol. Biol.* **22**, 1435-1446. (doi:Doi 10.1111/J.1420-9101.2009.01754.X).
- [6] Reed, T.E., Waples, R.S., Schindler, D.E., Hard, J.J. & Kinnison, M.T. 2010 Phenotypic plasticity and population viability: the importance of environmental predictability. *Proc. R. Soc. B* **277**, 3391-3400. (doi:Doi 10.1098/Rspb.2010.0771).
- [7] Lande, R. 1979 Quantitative genetic analysis of multivariate evolution, applied to brain:body size allometry. *Evolution* **33**, 402-416.
